# Supplementary material for: Elucidating the Structural Features of Bis(arylimino)acenaphthene (Aryl-BIAN) Bismuth Complexes: A Combined Single-Crystal X-ray Diffraction and Hirshfeld Analysis Approach
Source: MDPI journal article supplement (doi:10.3390/inorganics12050135), 2024-05-04
Supplement: s1 [file s1]

**Elucidating the Structural Features of Aryl-BIAN Bismuth Complexes: A  
Combined Single-Crystal X-Ray Diffraction and Hirschfeld Analysis  
Approach**

Beatriz P. Machado <sup>1,†</sup>, Maria Celador-Garcia <sup>1,†</sup>, Vitor Rosa <sup>1,\*</sup> and Clara S. B. Gomes <sup>1,\*</sup>

<sup>1</sup> LAQV-REQUIMTE, Department of Chemistry, NOVA School of Science and Technology,  
NOVA University of Lisbon, 2829-516 Caparica, Portugal;

\* Correspondence: clara.gomes@fct.unl.pt (C.S.B.G.); vitor.rosa@fct.unl.pt (V.R.)

† These authors contributed equally to this work

## Content

|                                                      |    |
|------------------------------------------------------|----|
| Infrared spectra.....                                | 3  |
| NMR spectra.....                                     | 5  |
| X-Ray data .....                                     | 7  |
| Hirshfeld surface analysis – Fingerprint plots ..... | 11 |

## Infrared spectra

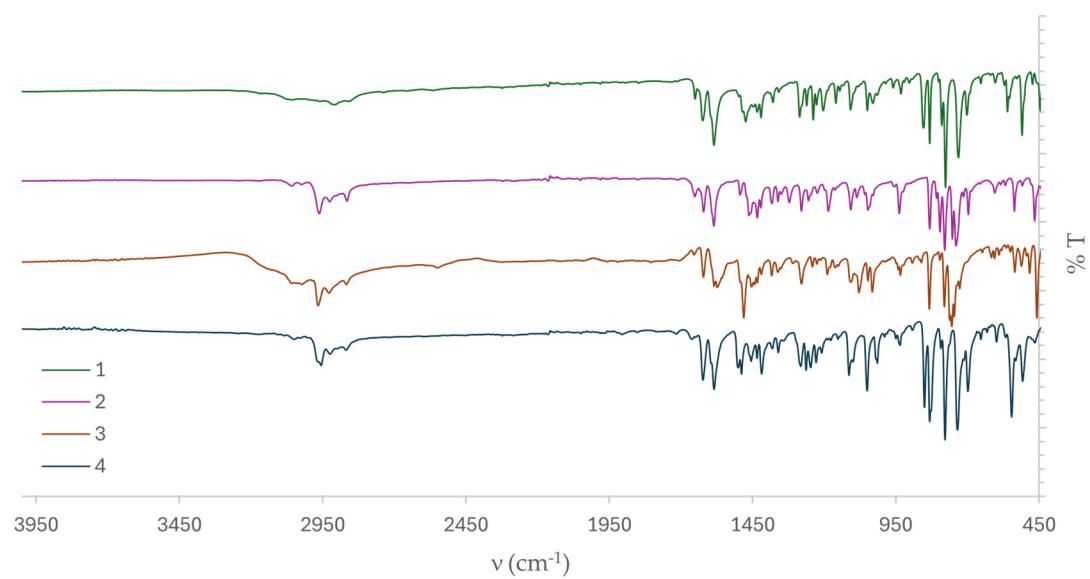

**Figure S1.** Stack of all FT ATR-IR spectra of complexes **1-4**.

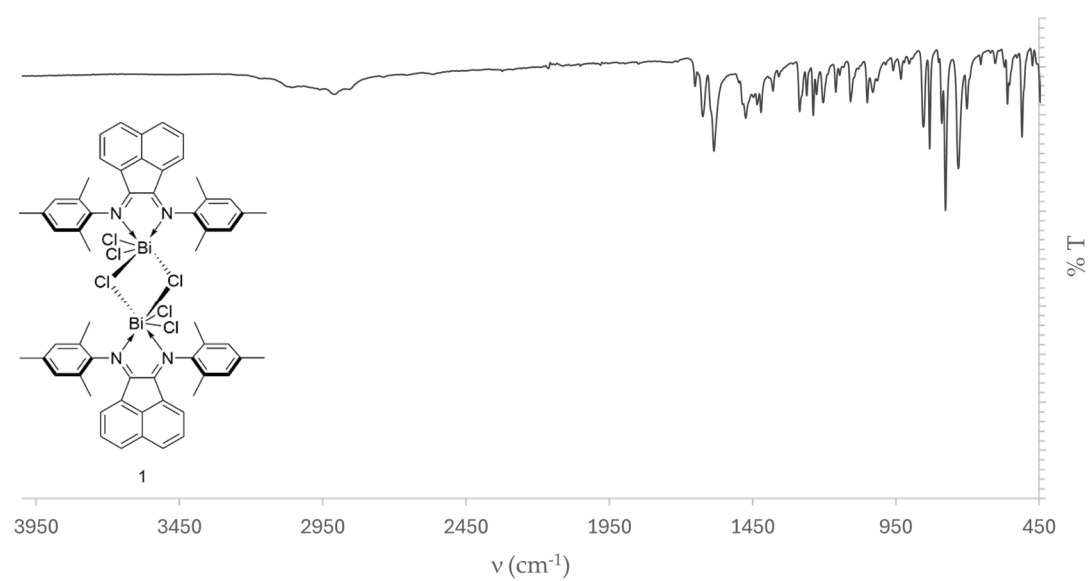

**Figure S2.** FT ATR-IR spectrum of complex **1**.

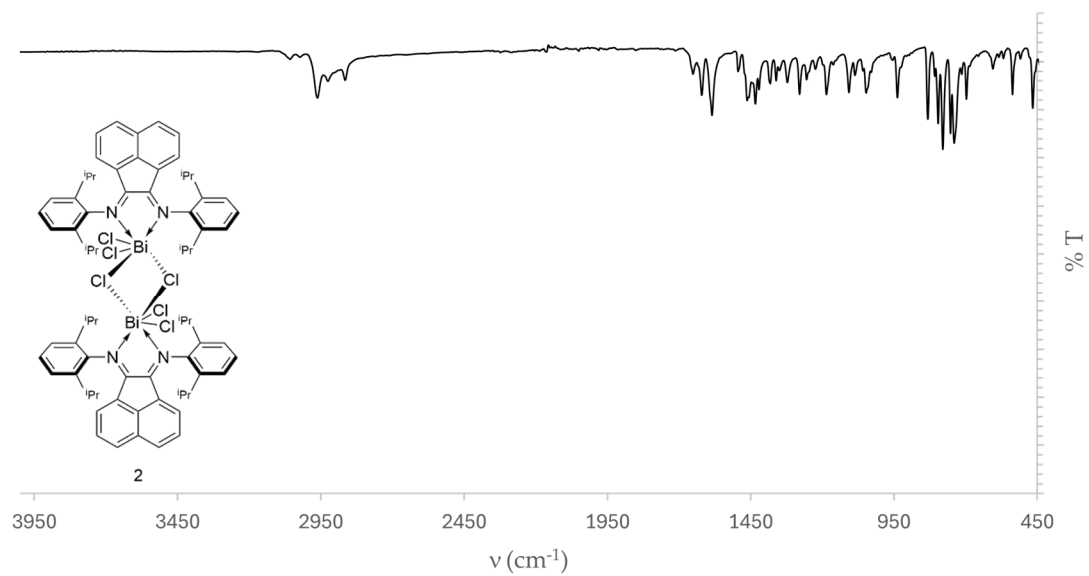

**Figure S3.** FT ATR-IR spectrum of complex **2**.

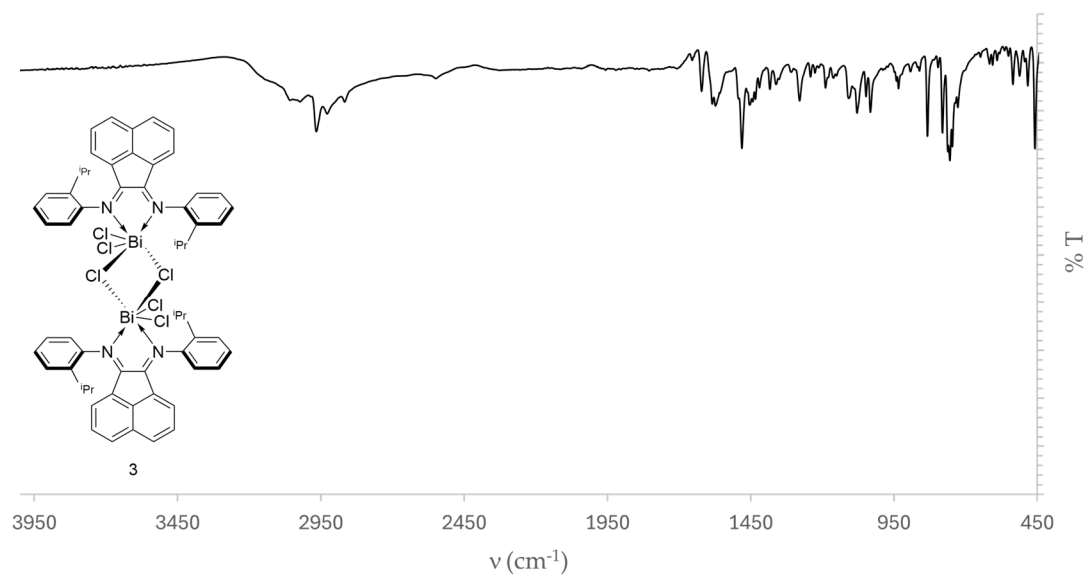

**Figure S4.** FT ATR-IR spectrum of complex **3**.

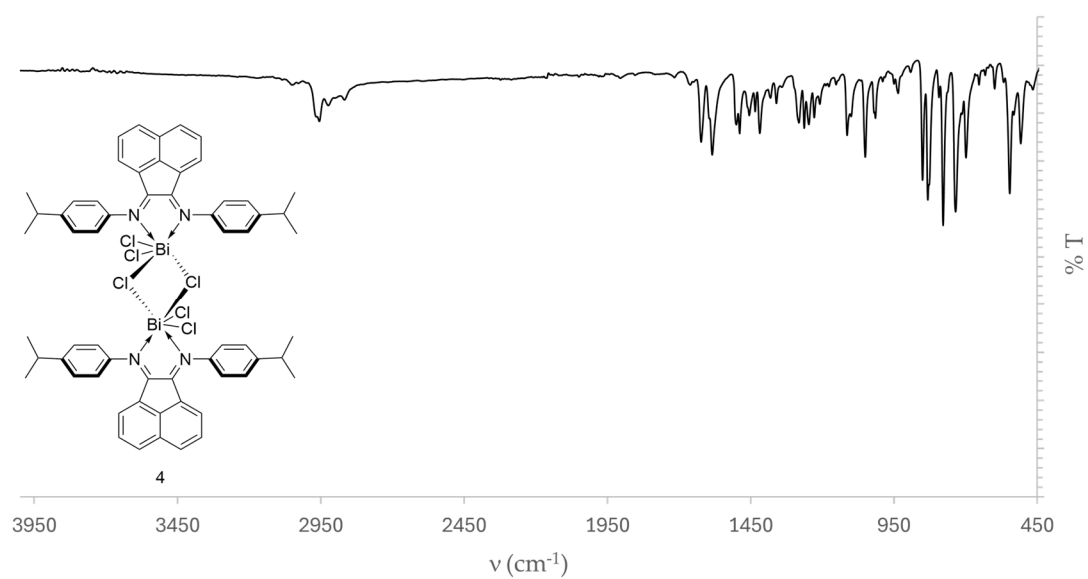

Figure S5. FT ATR-IR spectrum of complex 4.

## NMR spectra

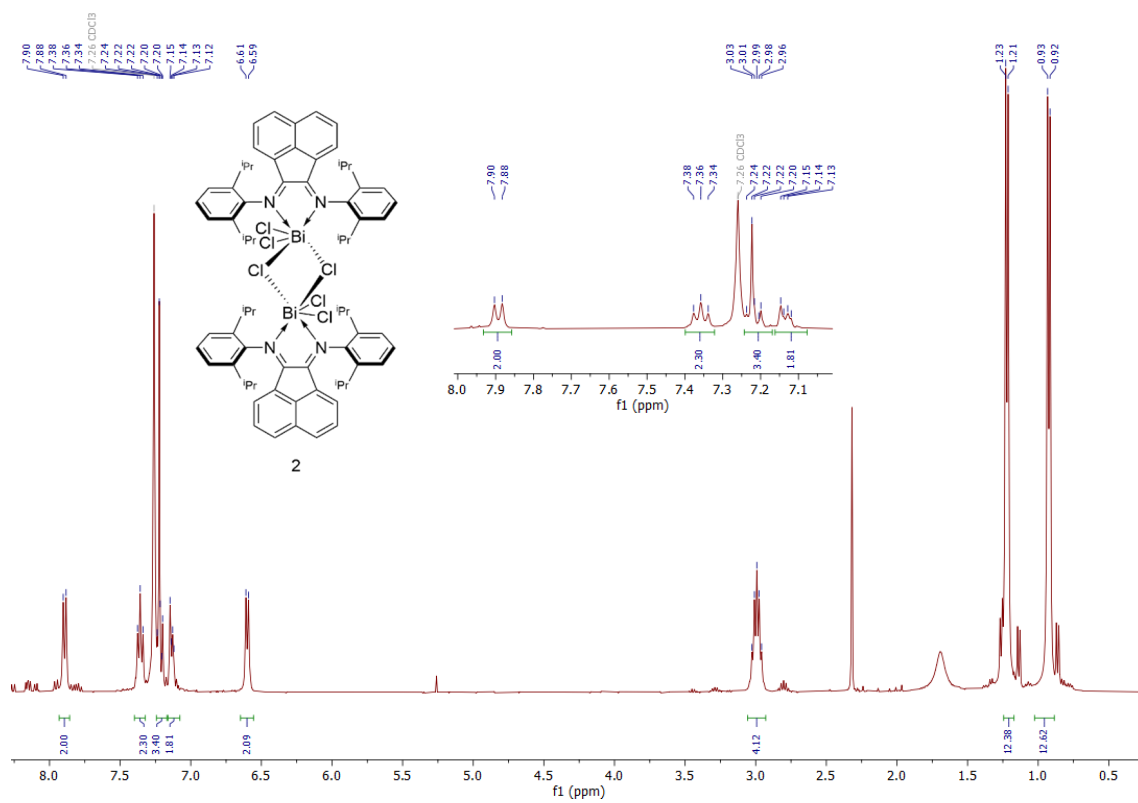

Figure S6.  $^1\text{H}$  NMR spectrum of complex 2 in  $\text{CDCl}_3$ .

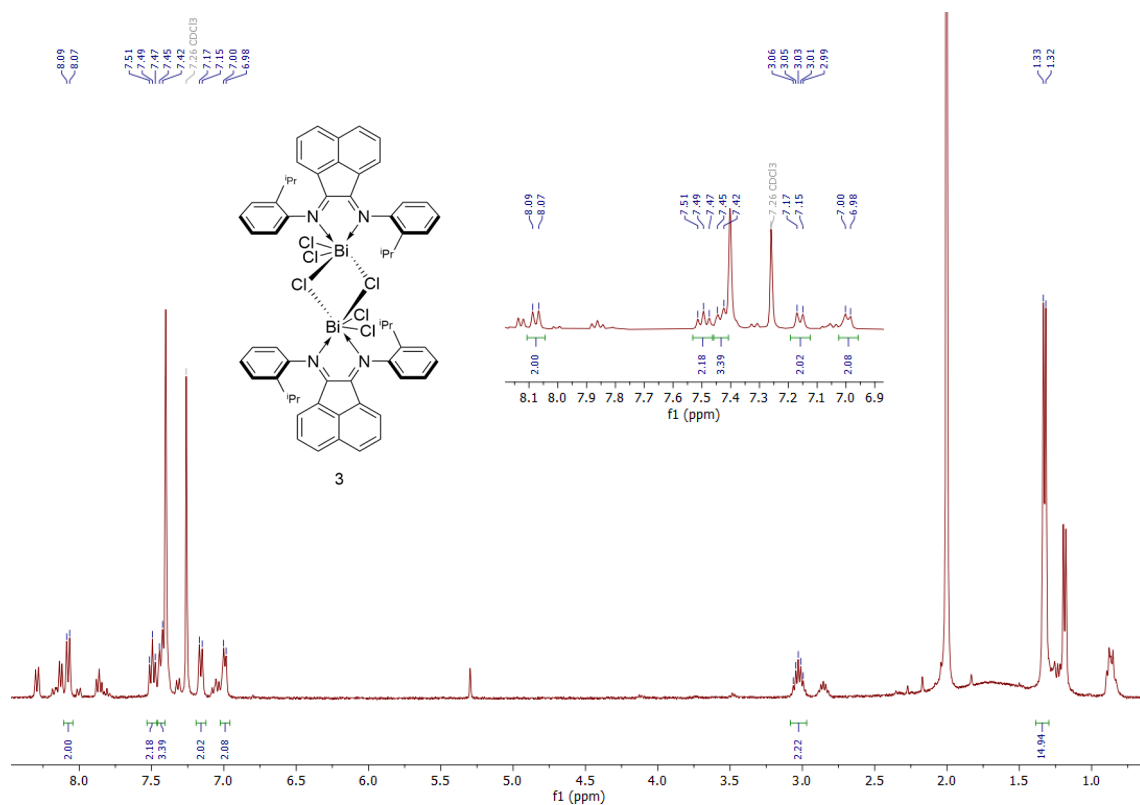

Figure S7. <sup>1</sup>H NMR spectra of complex **3** in CDCl<sub>3</sub>.

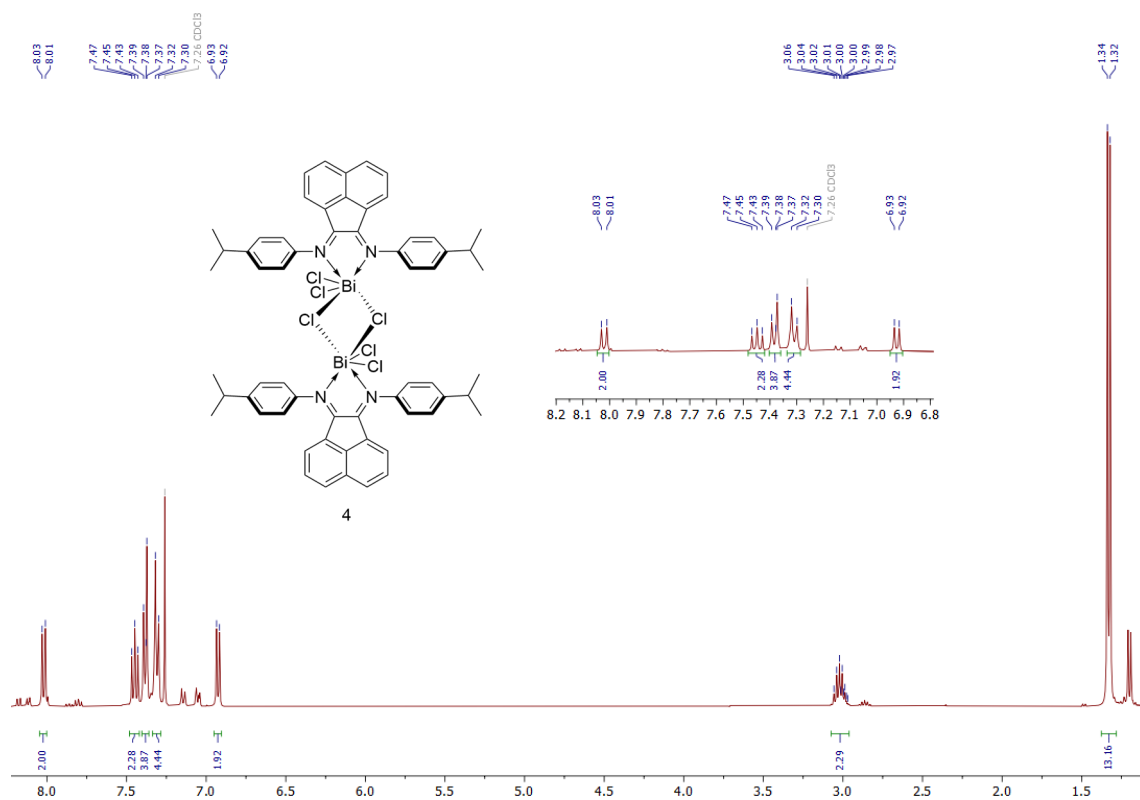

Figure S8. <sup>1</sup>H NMR spectrum of the complex **4** in CDCl<sub>3</sub>.

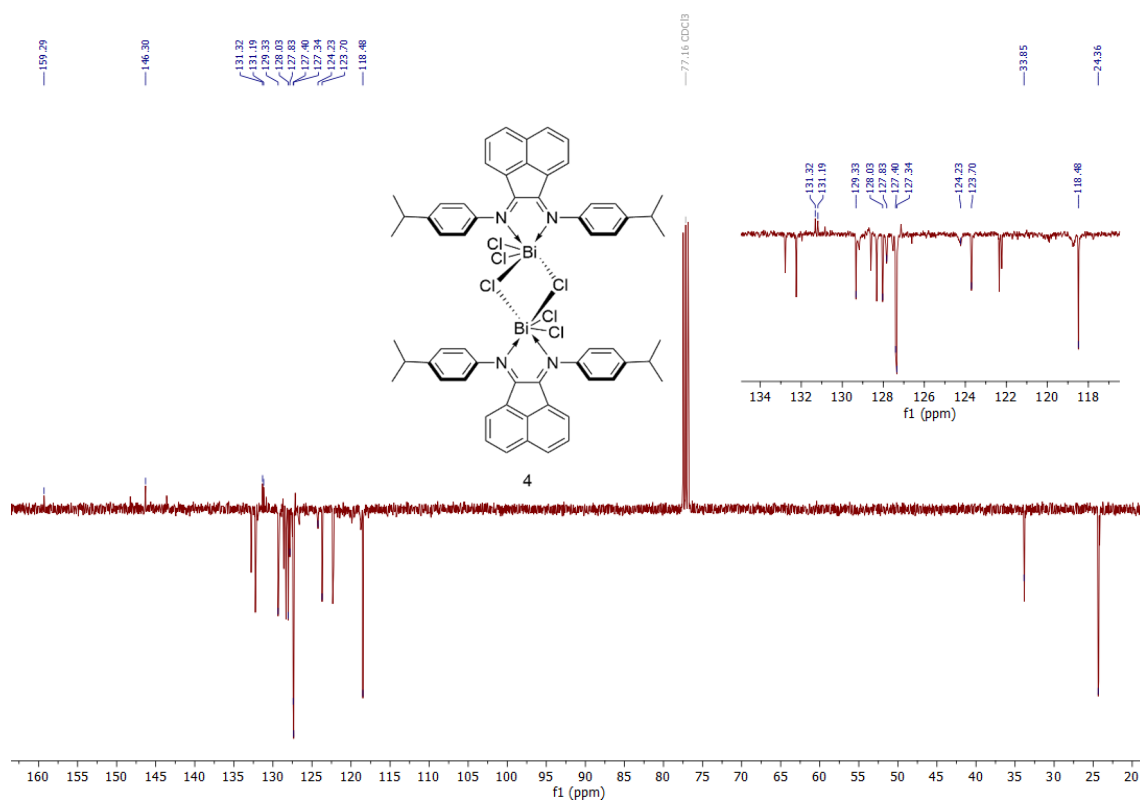

**Figure S9.**  $^{13}\text{C}$  NMR spectrum of the complex **4** in  $\text{CDCl}_3$ .

## X-Ray data

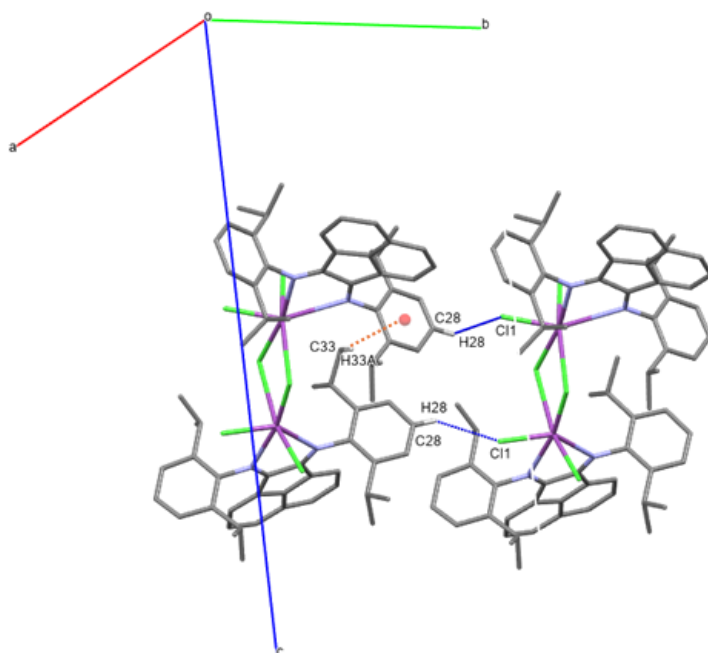

**Figure S10.** Intermolecular interactions of complex **2** shown as blue or orange dashed lines for  $\text{C-H}\cdots\text{Cl}$  and  $\text{C-H}\cdots\pi$  interactions, respectively.

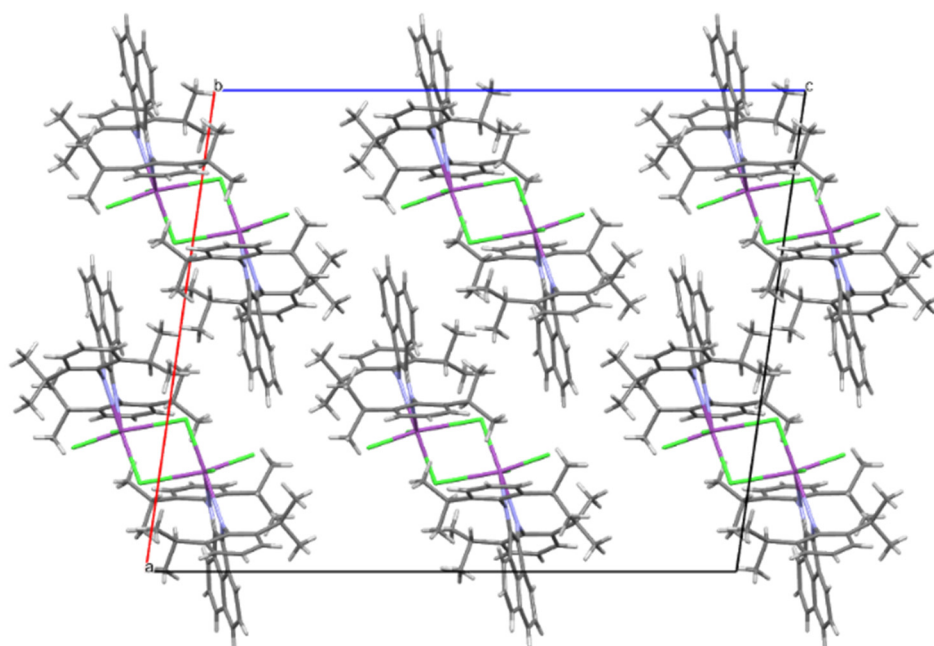

**Figure S11.** Packing of complex **2** viewed along *b* axis.

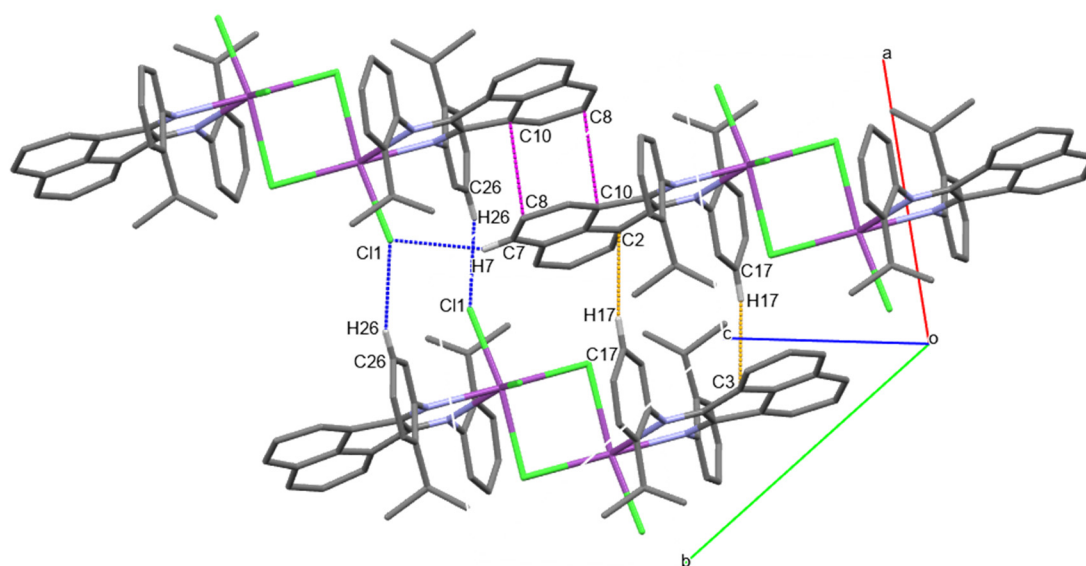

**Figure S12.** Intermolecular interactions of complex **3** shown as blue dashed lines for C – H...Cl interactions, orange dashed bonds for C-H... $\pi$  interactions and magenta for  $\pi$ ... $\pi$  interactions.



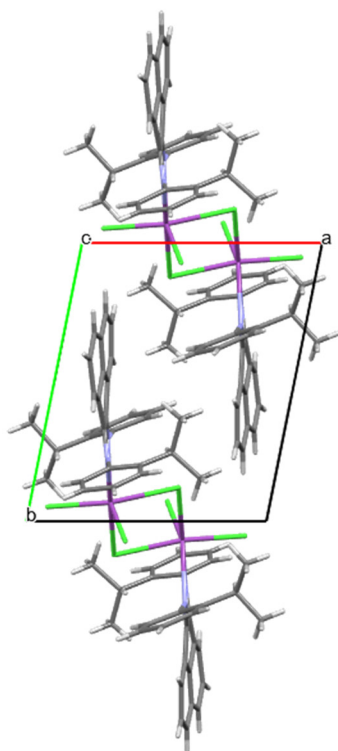

**Figure S13.** Packing of the complex **3** viewed along the *c* axis.

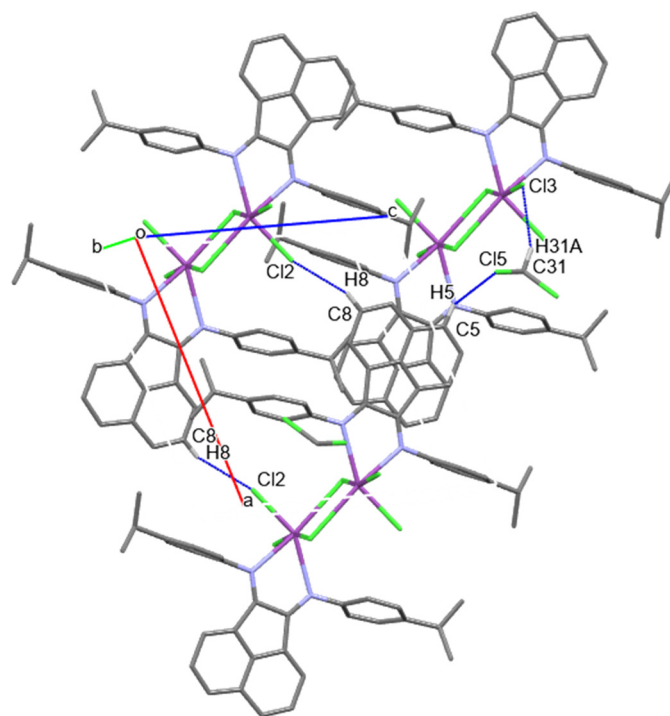

**Figure S14.** Intermolecular interactions of complex **4** shown as blue dash lines.

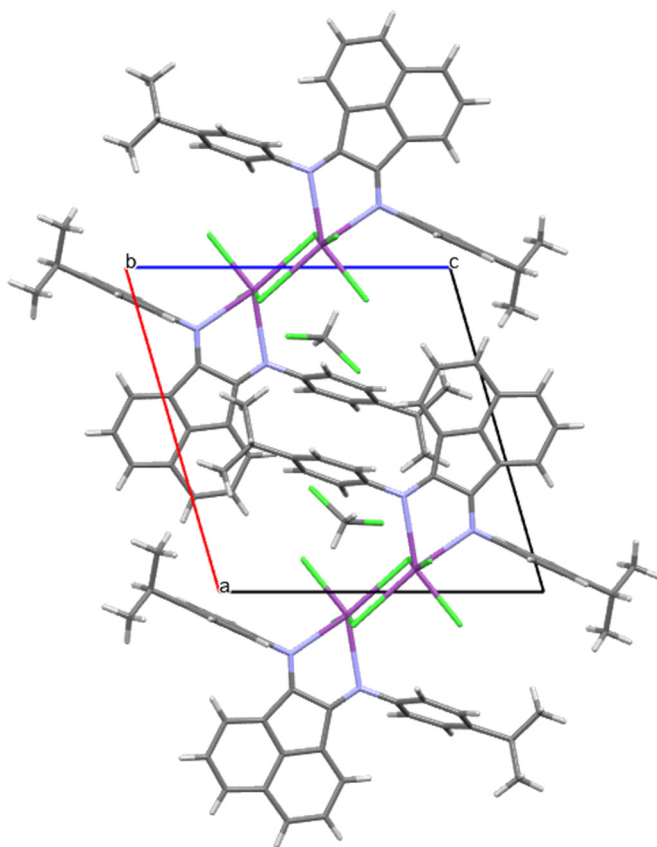

**Figure S15.** packing of complex **4** viewed along the *b* axis.

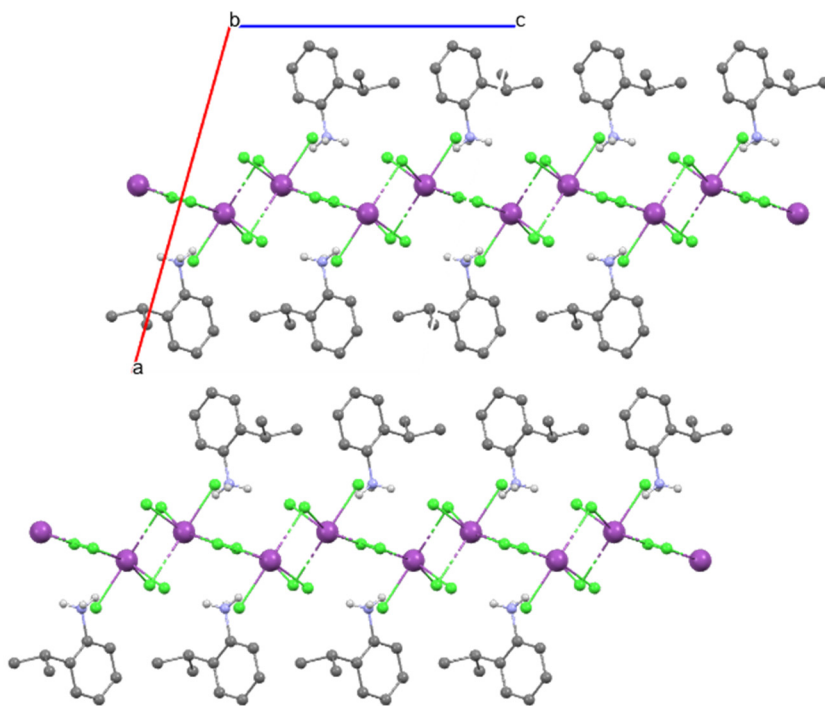

**Figure S16.** Packing of the compound **3-decomposition** viewed along the *b* axis.

## Hirshfeld surface analysis – Fingerprint plots

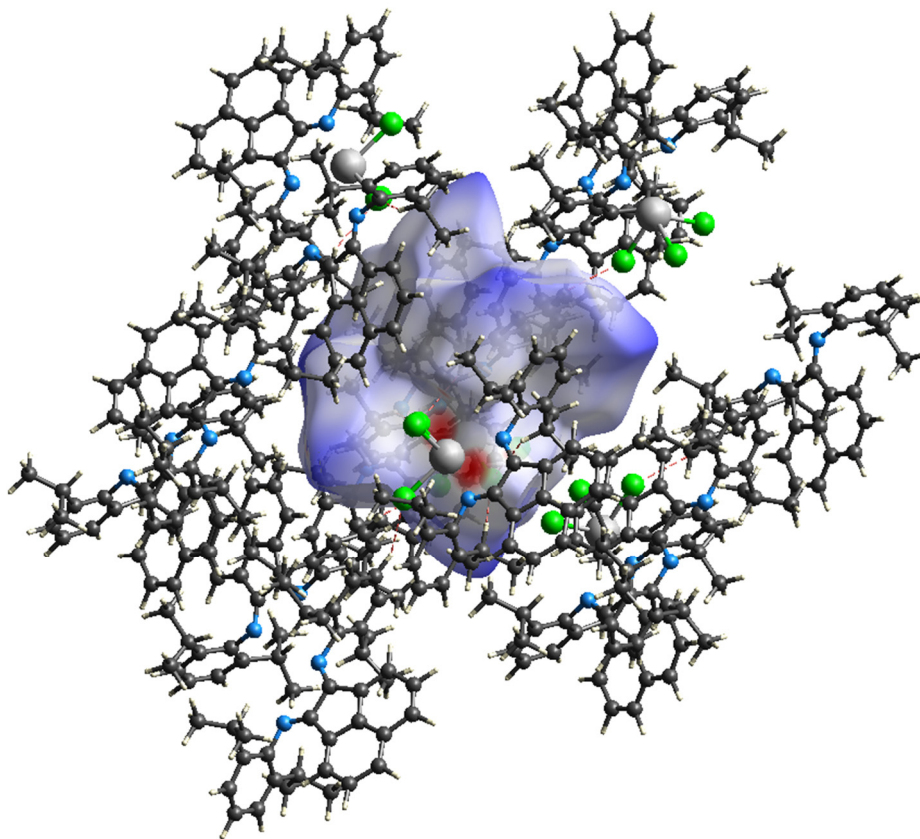

**Figure S17.** 3D Hirshfeld surface for complex **2**, mapped with  $d_{norm}$  property, showing intermolecular short contacts (red-dashed lines).

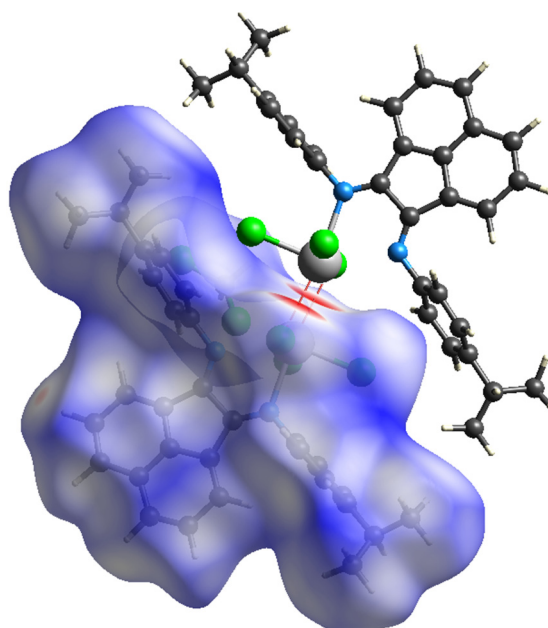

**Figure S18.** 3D Hirshfeld surface for complex **4**, mapped with  $d_{norm}$  property, showing intermolecular short contacts (red-dashed lines).

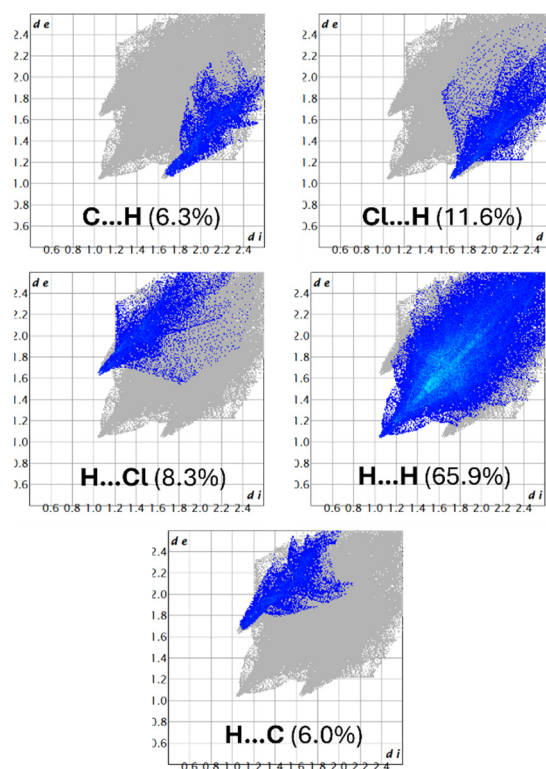

**Figure S19.** Two-dimensional fingerprint plots for the intermolecular interactions of the metal complex 2.

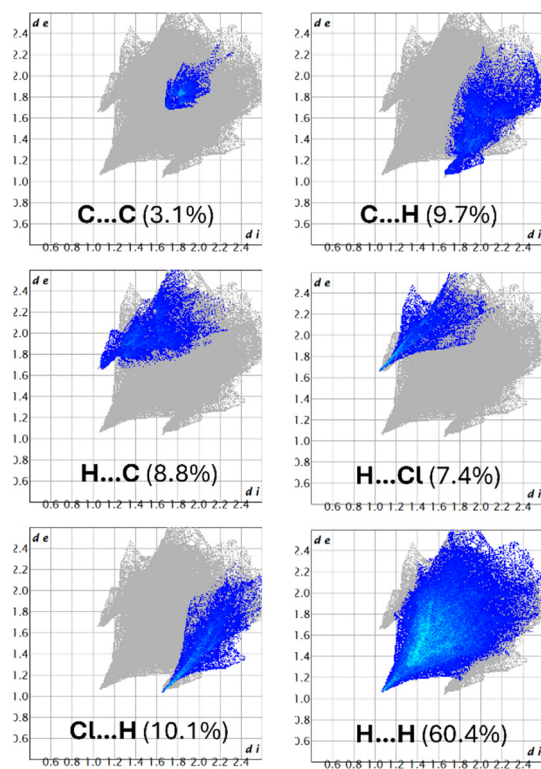

**Figure S20.** Two-dimensional fingerprint plots for the intermolecular interactions of the metal complex 3.

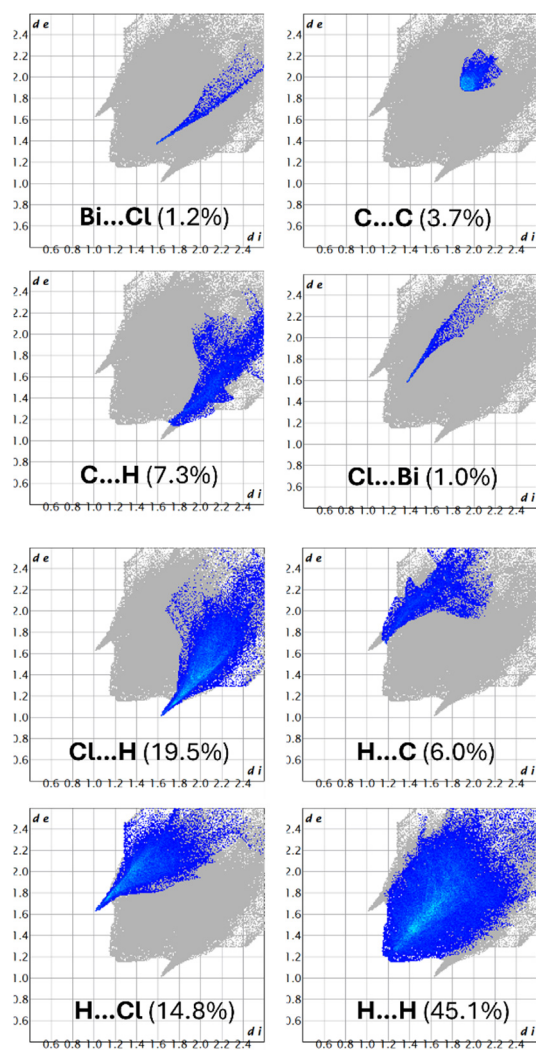

**Figure S21.** Two-dimensional fingerprint plots for the intermolecular interactions of the metal complex 4.

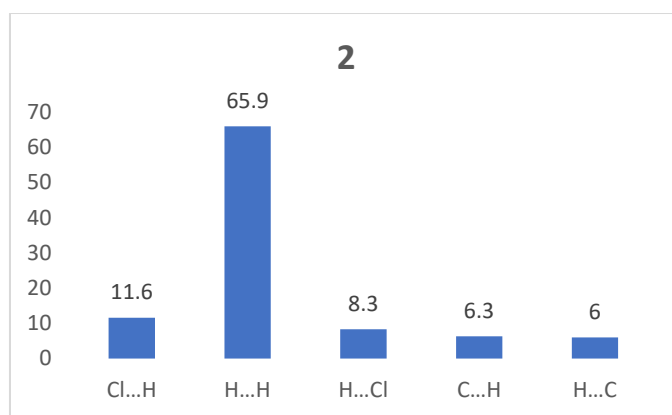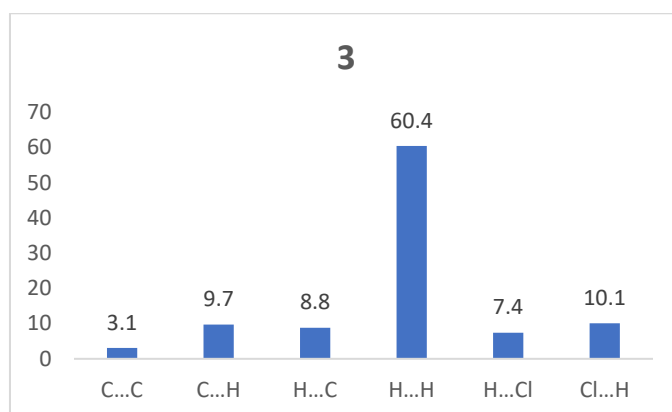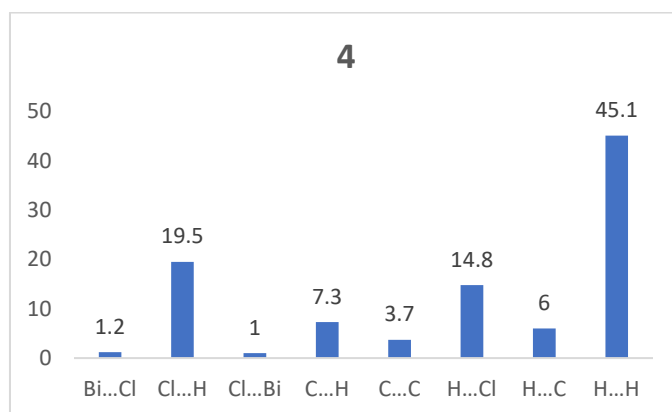

**Figure S22.** Summary of the percentages contributed by the various noncovalent interactions to the Hirshfeld surface in the crystal structures of complexes **2**, **3** and **4**.
